# Supplementary material
Source: publisher figshare collection journal article supplement (https://frontiersin.figshare.com/ndownloader/files/10695277)
Supplement: Supplementary file [file 10695277]

```

1   ATTC TTACCC CGAGCGGG CGTCTC CTCGCC CTCCTC TCCCTT CCGTCC ATCGCAT CTC
61  CTCG CGCTCC TTCGATCC CAAATC GGGCGCC GCGGCC GCTCGC CATGTC CCGCTCC CGC
                                     M S P S R
121  CCCG ACGAGG CGGACCCC GCGGCC GACTTCG GCTCCC ACCCCAC CGACCA AGAGTC GTC
    P D E A D P A A D F G S H P T D Q E L V
181  ACCA AATACC TACGCGC CACGTC GACTCCG GCGGGA ACCCGTG GCGGTA CGTCCAC GAG
    T K Y L R R H V D S G G N P W R Y V H E
241  GCCG ACGTGT ACGCGCC GATCCC GACGACC TCACCG GCAAGTA CTCGCC GCGCGTC GCC
    A D V Y A A D P D D L T G K Y S P A V A
301  AGCG ACGGGT CCAGGGCG TGGTAC TTCTTCA CCACCG TGCGTC CAAGAG CACCGGC GGG
    S D G S R A W Y F F T T V R S K S T G G
361  CAGA GGAGGG CGCGGCC GTGGGC GACGGCG GGTGCT GGCATC CGAGGC CGCGGCC AAG
    Q R R A R A V G D G G C W H S E A G A K
421  GACG TCGTCG GAGGCATC CGCAGC CCGCGCC CGATAG GCGGCG CCAATT CTTCTCG TTC
    D V V G G I R S P R P I G R R Q F S F
481  GTCA ACAAGG AGGGCCCC CGGCGG GTGCGGT CGGGGT GGATCAT GGTGGA GATCGG CTC
    V N K E G P R R V R S G W I M V E I G L
541  AAAT ACGCCC AGCAGAAC GCCTCC TCCGACG AGCTTG TTCTGT TAAGGT GTACCGG AGC
    K Y A Q Q N A S S D E L V L C K V Y R S
601  CCGC GGGCGC CACCGGT GCGGCC GCGGCCA ACAAAAT CCATGG CCGCCC ACCTCCC ACC
    P R A P P A A A A A N K S M A A P P P T
661  GCCA CGAAAT CCAAGACG GAGGAG GCTACAC CACCTC CGATGA CGTGAA ACCGGTG GTG
    A T K S K T E E A T P P P D D V K P V V
721  GCGG CTGCGC AGACTCCC GACACC AAAATAC TCAGGG CCGCGAA GGAGGC GCGCGC ACT
    A A A Q T P D T K I L R A A K E A A A
781  GGAT GCAAGA GGAAGGCC GACGTG AAGAGT CTGGTG CAAGAAG GGGCAA GCGGCTC TGC
    G C K R K A D V K S S G A R R G K R L C
841  TCCC GCTGCC GGGCGGAG ACATCG GAATCGG ACAGCG AGACGGC GGACTT TGACAGG TCG
    S R C R A E T S E S D S E T A V L D R S
901  CCGT CCATCG AAGACGAA ACGGCG GACTCTT CAGAAA TCCATGG AAGCAG TGATGGC AAA
    P S I E D E T A D S S E I H G S S D G K
961  TTCA TCAGGT TCTTGTGA TTTAGT TCGATCT GGAGCC CCGAGGG TGCTAG CCTAGAT TGG
    F I R F L *
1021 AATC AGCGTG TACCAACA AAATGG ATAGAGC TGCTGT AGTCTC ATTTTG AGTCTT AAG
1141 CCCT AGTATA ATGCTAC CCCAAA TCATGCG TTACCC GCAAAT TCAGCA TGATACA GAC
1201 AAGG TAAGCA TTTATTTT CAGTAT CAGTTGC ACCGTA TGGTGCA CTTGTA GATAGAA GTT
1261 ACTA CAGCAT GGAGAAAT TTGGA GATTAACA TATAGA CATTAGA CATTTT CTTTCAT GTA
1321 ATAT AGTAGT AGAACACA CAAGAG GTTCAAG CTTGAA TGATTAG AAAAGC TTCTTGC C

```

**Supplementary Figure S3. Full-length coding sequence (CDS) and amino acid sequences of OsNAC14.** Data represent full-length *OsNAC14* transcript. Sequence assigned with amino acid represent full -length CDS region of *OsNAC14*. Boxed sequence represents conserved NAM motif, and shaded sequence represents predicted nuclear localization signal (NLS) (Kosugi et al., 2009). The sequence boxed with red indicates position of deletion in *inosnac14* mutant plants.
